# Supplementary material for: The Vaporization Enthalpy and Vapor Pressure of (±) N-Ethyl Amphetamine by Correlation Gas Chromatography
Source: MDPI journal article supplement (doi:10.3390/molecules26133809), 2021-06-22
Supplement: s1 [file s1]

Supporting Materials

# The Vaporization Enthalpy and Vapor Pressure of (±)-N-Ethylamphetamine at $T/K = 298.15$ by Correlation Gas Chromatography

James Chickos

Department of Chemistry and Biochemistry, University of Missouri-St. Louis, St. Louis MO 63121

**Table S1. A:** Retention times of N-ethylamphetamine and compounds used as standards.

| Run 1                | T/K | 392.9  | 397.9  | 403    | 408.1  | 413.1 | 418.1 | 423.2 |
|----------------------|-----|--------|--------|--------|--------|-------|-------|-------|
| Methanol             |     | 0.517  | 0.525  | 0.529  | 0.524  | 0.062 | 0.538 | 0.542 |
| N,N-Di-n-butylamine  |     | 1.261  | 1.172  | 1.095  | 1.020  | 0.500 | 0.928 | 0.887 |
| N,N-Di-n-pentylamine |     | 2.879  | 2.518  | 2.223  | 1.967  | 1.300 | 1.611 | 1.470 |
| N-Ethylamphetamine   |     | 4.434  | 3.814  | 3.317  | 2.891  | 2.083 | 2.285 | 2.048 |
| N,N-Di-n-hexylamine  |     | 7.893  | 6.562  | 5.524  | 4.656  | 3.507 | 3.453 | 2.992 |
| 4-Benzylpiperidine   |     | 17.772 | 14.578 | 12.128 | 10.094 | 7.999 | 7.239 | 6.157 |
| N,N-Di-n-heptylamine |     | 23.179 | 18.485 | 14.970 | 12.139 | 9.482 | 8.321 | 6.930 |

**Table S1. B:** Correlation between  $\Delta_l^g H_m(298.15 \text{ K})$  and  $\Delta H_{\text{trn}}(408\text{K})$  of the standards<sup>1</sup>

| Run 1                | -slope<br>T/K | intercept   | $\Delta H_{\text{trn}}(408\text{K})$<br>kJ·mol <sup>-1</sup> | $\Delta_l^g H_m(298.15 \text{ K})/\text{kJ·mol}^{-1}$<br>(lit) <sup>2</sup> | (calc)   |
|----------------------|---------------|-------------|--------------------------------------------------------------|-----------------------------------------------------------------------------|----------|
| N,N-Di-n-butylamine  | 4197.2±20     | 10.984±0.05 | 34.89±0.16                                                   | 50.1±0.6                                                                    | 50.4±3.4 |
| N,N-Di-n-pentylamine | 5121.3±23     | 12.181±0.06 | 42.58±0.19                                                   | 61.3±2.1                                                                    | 61.0±3.7 |
| N-Ethylamphetamine   | 5238.1±24     | 11.973±0.06 | 43.55±0.20                                                   |                                                                             | 62.4±3.8 |
| N,N-Di-n-hexylamine  | 6037.1±24     | 13.374±0.06 | 50.19±0.20                                                   | 70.7±3.4                                                                    | 71.5±4.0 |
| 4-Benzylpiperidine   | 6149.2±27     | 12.810±0.07 | 51.12±0.22                                                   | 74.2±1.0                                                                    | 72.8±4.1 |
| N,N-Di-n-heptylamine | 6937.5±36     | 14.546±0.09 | 57.68±0.30                                                   | 81.3±4.9                                                                    | 81.8±4.3 |

$$\Delta_l^g H_m(298.15 \text{ K})/\text{kJ·mol}^{-1} = (1.38 \pm 0.06) \Delta H_{\text{trn}}(408 \text{ K}) + (2.3 \pm 2.8) \quad r^2 = 0.9947 \quad (\text{S1})$$

<sup>1</sup> All uncertainties represent one standard deviation.

<sup>2</sup> Vaporization enthalpies are average literature values; individual values and references are reported in Table 2.

**Table S2. A:** Retention times of N-ethylamphetamine and compounds used as standards.

| Run 2                | 392.9  | 398    | 403.1  | 408.2<br>t/min | 413.2  | 418.2 | 423.2 |
|----------------------|--------|--------|--------|----------------|--------|-------|-------|
| Methanol             | 0.541  | 0.536  | 0.551  | 0.545          | 0.549  | 0.557 | 0.559 |
| N,N-Di-n-butylamine  | 1.315  | 1.211  | 1.142  | 1.049          | 1.006  | 0.960 | 0.919 |
| N,N-Di-n-pentylamine | 2.998  | 2.613  | 2.318  | 2.035          | 1.842  | 1.670 | 1.527 |
| N-Ethylamphetamine   | 4.614  | 3.966  | 3.459  | 2.996          | 2.663  | 2.371 | 2.130 |
| N,N-Di-n-hexylamine  | 18.524 | 15.237 | 12.648 | 10.488         | 8.871  | 7.495 | 6.405 |
| 4-Benzylpiperidine   | 24.132 | 19.318 | 15.625 | 12.647         | 10.437 | 8.624 | 7.212 |
| N,N-Di-n-heptylamine | 24.132 | 19.318 | 15.625 | 12.647         | 10.437 | 8.624 | 7.212 |

**Table S2. B:** Correlation between  $\Delta_l^g H_m(298.15\text{ K})$  and  $\Delta H_{\text{tm}}(408\text{ K})$  of the standards <sup>1</sup>

| Run 2                | -slope<br>T/K | intercept   | $\Delta H_{\text{tm}}(408\text{ K})$<br>kJ·mol <sup>-1</sup> | $\Delta H_{\text{vap}}(298\text{ K})$<br>kJ·mol <sup>-1</sup> (lit) | $\Delta H_{\text{vap}}(298\text{ K})$<br>kJ·mol <sup>-1</sup> (calc) |
|----------------------|---------------|-------------|--------------------------------------------------------------|---------------------------------------------------------------------|----------------------------------------------------------------------|
| N,N-Di-n-butylamine  | 4214.4±74     | 10.987±0.18 | 35.04±0.62                                                   | 50.1±0.6                                                            | 50.2±4.5                                                             |
| N,N-Di-n-pentylamine | 5120.2±31     | 12.137±0.07 | 42.57±0.25                                                   | 61.3±2.1                                                            | 60.9±4.9                                                             |
| N-Ethylamphetamine   | 5236.5±22     | 11.927±0.05 | 43.53±0.18                                                   |                                                                     | 62.3±4.9                                                             |
| N,N-Di-n-hexylamine  | 6041.9±25     | 13.342±0.06 | 50.23±0.21                                                   | 70.7±3.4                                                            | 71.8±5.3                                                             |
| 4-Benzylpiperidine   | 6171.3±13     | 12.844±0.03 | 51.31±0.11                                                   | 74.2±1.0                                                            | 73.3±5.4                                                             |
| N,N-Di-n-heptylamine | 6950.4±12     | 14.533±0.03 | 57.78±0.10                                                   | 81.3±4.9                                                            | 82.5±5.8                                                             |

$$\Delta H_{\text{vap}}(298.15\text{ K})/\text{kJ}\cdot\text{mol}^{-1} = (1.42\pm0.08)\Delta H_{\text{tm}}(408\text{ K}) + (0.46\pm3.56) \quad r^2 = 0.9939 \quad \text{S2)}$$

<sup>1</sup> All uncertainties represent one standard deviation.

<sup>2</sup> Vaporization enthalpies are average literature values; individual values and references are reported in Table 2.

**Table S3.** A comparison of the vapor pressures of (S) (+)-methamphetamine to N-ethylamphetamine as a function of temperature <sup>1</sup>

| (S) (+)-Methamphetamine<br>T/K |      | N-Ethylamphetamine<br>p/Pa <sup>2</sup> |                      | (S) (+)-Methamphetamine<br>T/K |        | N-Ethylamphetamine<br>p/Pa <sup>2</sup> |  |
|--------------------------------|------|-----------------------------------------|----------------------|--------------------------------|--------|-----------------------------------------|--|
| 298.15                         | 39   | 19±11                                   | (8.2) <sup>S1</sup>  | 390                            | 5600   | 3900±870                                |  |
| 310                            | 91   | 48±24                                   |                      | 400                            | 8200   | 5700±1200                               |  |
| 320                            | 180  | 98±45                                   |                      | 410                            | 12000  | 8300±1500                               |  |
| 330                            | 320  | 190±77                                  |                      | 420                            | 16000  | 12000±1900                              |  |
| 340                            | 570  | 340±130                                 |                      | 430                            | 22000  | 16000±2400                              |  |
| 350                            | 960  | 590±200                                 |                      | 440                            | 29000  | 22000±2900                              |  |
| 360                            | 1600 | 1000±310                                |                      | 450                            | 39000  | 30000±3400                              |  |
| 368.2                          |      | 1500±410                                | (800) <sup>S2</sup>  | 460                            | 50000  | 39000                                   |  |
| 370                            | 2500 | 1600±450                                |                      | 470                            | 64000  | 51000                                   |  |
| 372.2                          |      | 1800±480                                | (2700) <sup>S3</sup> | 480                            | 81000  | 65000                                   |  |
| 376.2                          |      | 2100±560                                | (3300) <sup>S4</sup> | 490                            | 101300 | 82000                                   |  |
| 378.2                          |      | 2300±600                                | (1900) <sup>S5</sup> | 500                            |        | 101300                                  |  |
| 380                            | 3800 | 2500±630                                |                      | 507.7                          |        | 120000 (101325) <sup>S1</sup>           |  |

<sup>1</sup> N-Methylamphetamine: vapor pressures evaluated using Eq. (S1);

$$\ln(p/p^0) = 7.592 - 2119.6(T/K) - 849,290(T/K)^2 - 31,824,000(T/K)^3; \quad p^0 = 101,325\text{ Pa} \quad \text{(S3)}$$

N-ethylamphetamine: vapor pressure from  $T = (298.15\text{ to }450)\text{ K}$  evaluated by correlation;

$$\text{from } T = (460\text{ to }500)\text{ K: } \ln(p/p^0) = (8.347\pm0.01) - (2,872.4\pm3.7)(T/K) - (646,650\pm665)(T/K)^2 \quad \text{(S4)}$$

<sup>2</sup> Uncertainties are a measure of the quality of the correlation; actual uncertainties may differ.

## References

<sup>S1</sup> Estimate, EPI Suite version 4.11 (Estimation Programs Interface), The EPI Suite can be downloaded at <http://www.epa.gov/oppt/exposure/pubs/episuitd1.htm>; accessed 4/08/21.

- <sup>s2</sup> Chiavarelli, S.; Marini-Bettolo, G. B. Synthetic sympatholytic substances in the ergotamine series. II. Derivatives of benzylamine, phenethylamine, and  $\alpha$ -methylphenethylamines with amine and amide functions. *Gazzetta Chimica Italiana* **1951**, *81*, 89-97.
- <sup>s3</sup> Shiho, D.; Kanayama, K.; A new process of alkylation of amines. II. *Nippon Kagaku Kaishi* 1944, 65, 237-239.
- <sup>s4</sup> Temmler, T. H.; Keil, F.; Dobke, W.  $\beta$ -Aralkylamines. DE 767263 **1952**.
- <sup>s5</sup> Leonard, N. J.; Adamcik, J. A.; Djerassi, C.; Halpern, O. Cyclic amino acyloins and amino ketones. X. Trans-annular nitrogen-carbonyl interaction in cyclic aminoketones and optical rotatory dispersion. *J. Am. Chem. Soc.* **1958**, *80*, 4858-4862.
